# Supplementary material for: The accuracy of four formulas for LDL-C calculation at the fasting and postprandial states
Source: Frontiers journal article supplement (doi:10.3389/fcvm.2022.944003), 2022-08-18
Supplement: Image_1.pdf [file Image_1.pdf]

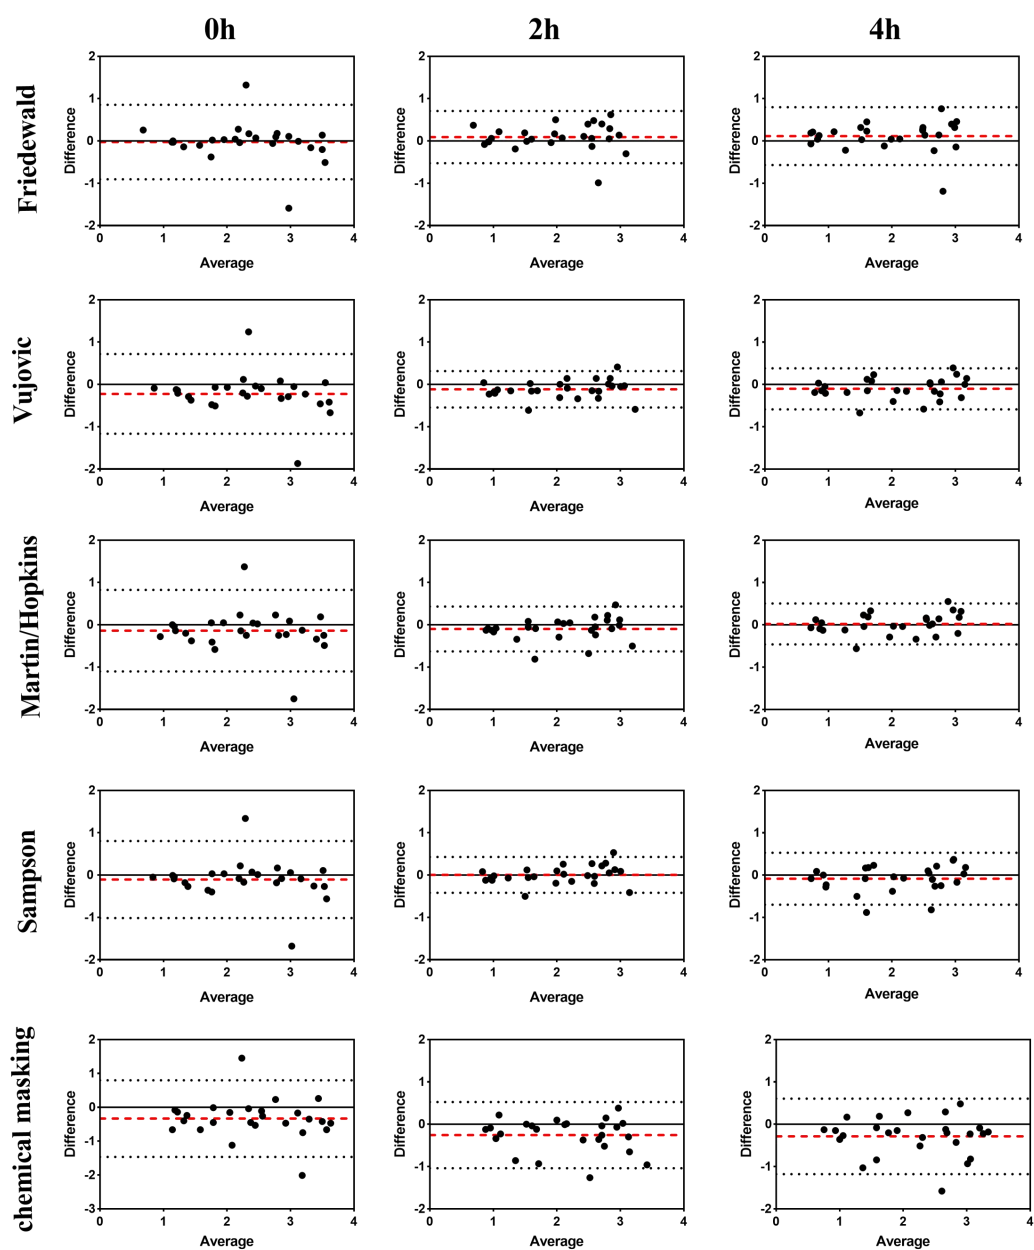

Figure S1 The Bland-Altman plots of the bias between LDL-C<sub>VAP</sub> and calculated LDL-C by different formulas as well as LDL-C<sub>CM</sub>.
